# Supplementary material for: Gold nanocluster based nanocomposites for combinatorial antibacterial therapy for eradicating biofilm forming pathogens
Source: Royal Society of Chemistry journal article supplement (doi:10.1039/d1qm00936b), 2022-01-01
Supplement: d1qm00936b1.pdf [file d1qm00936b1.pdf]

## Supplementary Information

### Gold Nanoclusters Based Nanocomposites for Combinatorial Antibacterial Therapy on Biofilm Forming Pathogens

Yuvasri Genji Srinivasulu<sup>a</sup>, Anbu Mozhi<sup>a</sup>, Nirmal Goswami<sup>b,c</sup>, Qiaofeng Yao<sup>a</sup>, Jianping

Xie<sup>a,\*</sup>

<sup>a</sup> Department of Chemical and Biomolecular Engineering, National University of Singapore,  
Kent Ridge, Singapore 117585

<sup>b</sup> Materials Chemistry Department, CSIR-Institute of Minerals and Materials Technology,  
Acharya Vihar, Bhubaneswar, Odisha-751013, India

<sup>c</sup> Academy of Scientific & Innovative Research (AcSIR), CSIR- Human Resource  
Development Centre, Ghaziabad, 201 002, India

\*Corresponding Author's Email: [chexiej@nus.edu.sg](mailto:chexiej@nus.edu.sg)

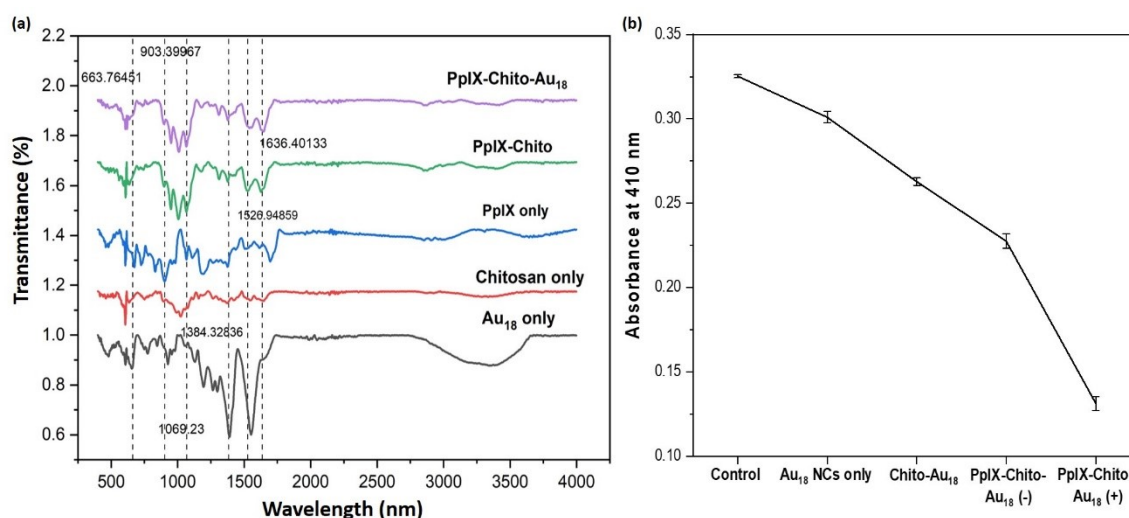

**Figure S1.** (a) FT-IR spectra of Au<sub>18</sub> NCs alone (black spectra), chitosan only (red spectra), PpIX only (blue spectra), PpIX-Chito (green spectra), and PpIX-Chito-Au<sub>18</sub> (violet spectra). (b) Determination of singlet oxygen produced extracellularly by samples (Au<sub>18</sub> NCs, Chito-Au<sub>18</sub>, and PpIX-Chito-Au<sub>18</sub>) under dark (-) and light (+) conditions. The reduction in absorption of DPBF at 410 nm is directly proportional to the amount of ROS produced.

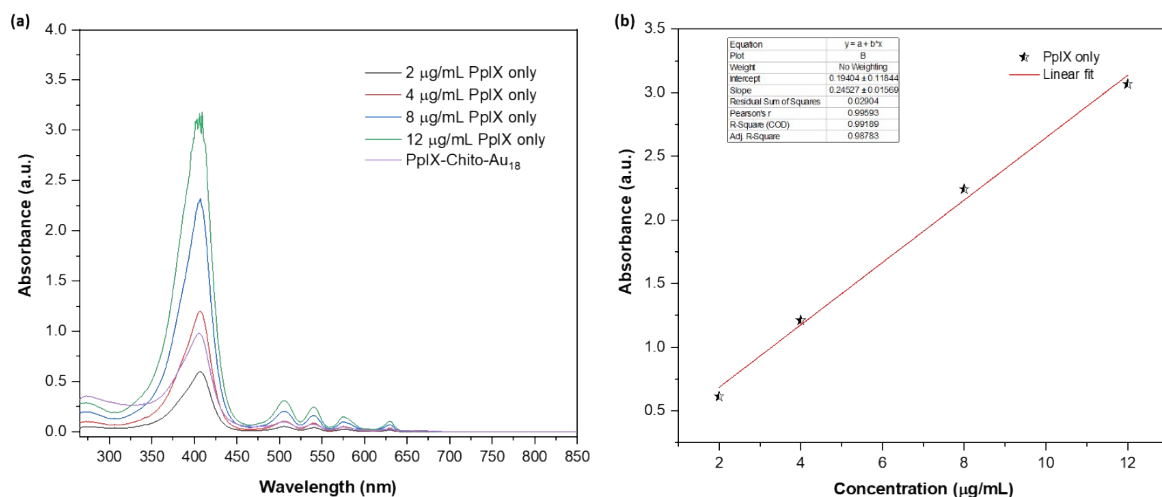

**Figure S2.** Determination of loading content of PpIX in PpIX-Chito-Au<sub>18</sub> nanocomposite. (a) UV-vis absorption spectra and (b) calibration curve of PpIX in DMSO of different concentrations.

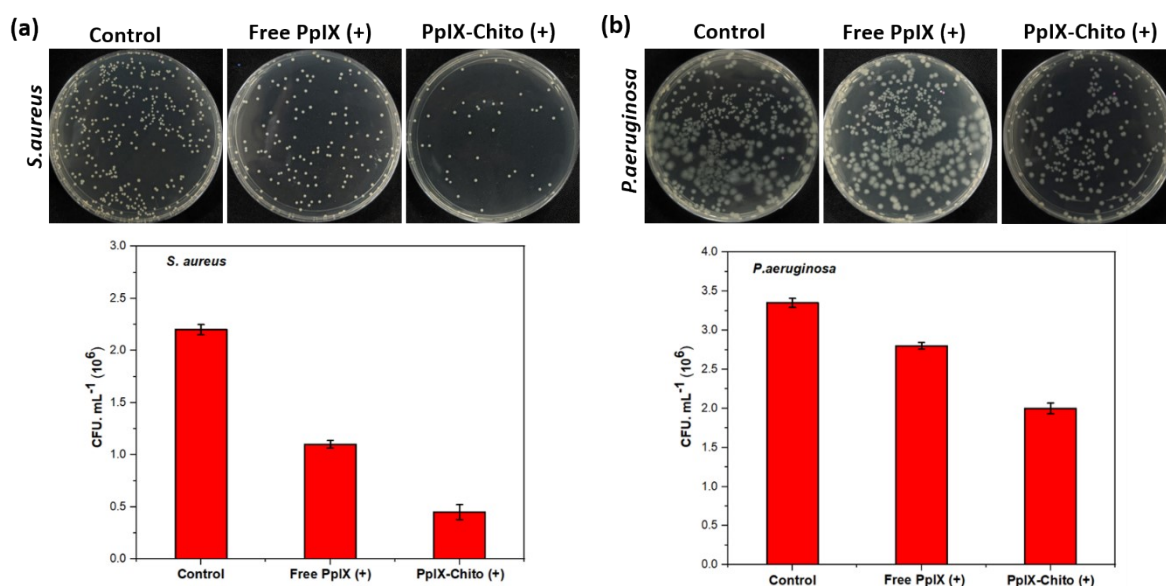

**Figure S3.** (a) Representative photographs of bacterial colonies (*S. aureus*) obtained after treatment with free PpIX(+) and PpIX-Chito(+) nanocomposite under light (+) conditions. Quantitative evaluation of antibacterial capabilities of the treatment groups on *S. aureus* by counting the colonies grown on LB agar plates are shown below **Figure S3a**. Data are means  $\pm$  S.D., n = 3. (b) Representative photographs of bacterial colonies (*P. aeruginosa*) obtained after treatment with free PpIX(+) and PpIX-Chito(+) nanocomposite under light (+) conditions. Quantitative evaluation of antibacterial capabilities of the treatment groups on *P. aeruginosa* by counting the colonies grown on LB agar plates are shown below **Figure S3b**. Data are means  $\pm$  S.D., n = 3.

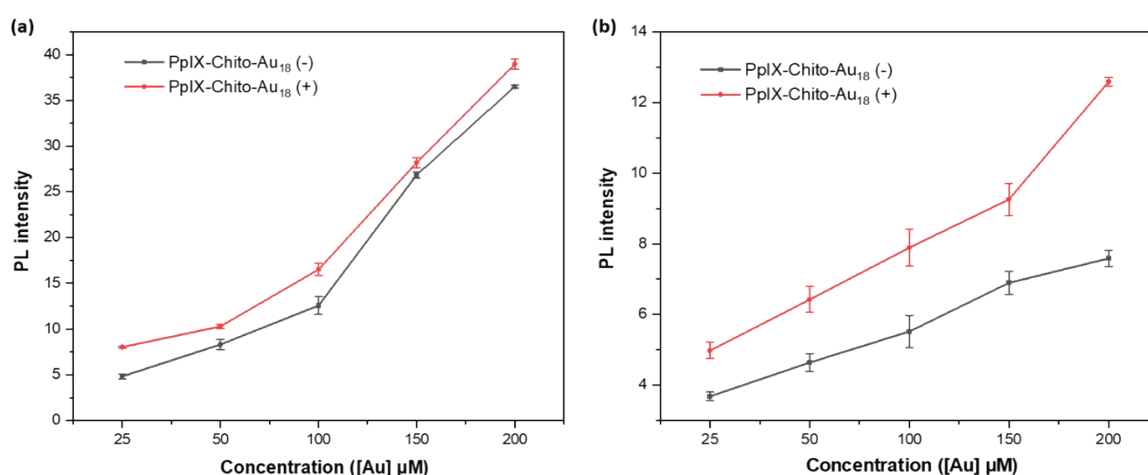

**Figure S4.** NPN uptake on (a) *S. aureus* and (b) *P. aeruginosa* after incubation with various concentrations of PpIX-Chito-Au<sub>18</sub> nanocomposite under dark (-) and light (+) conditions.

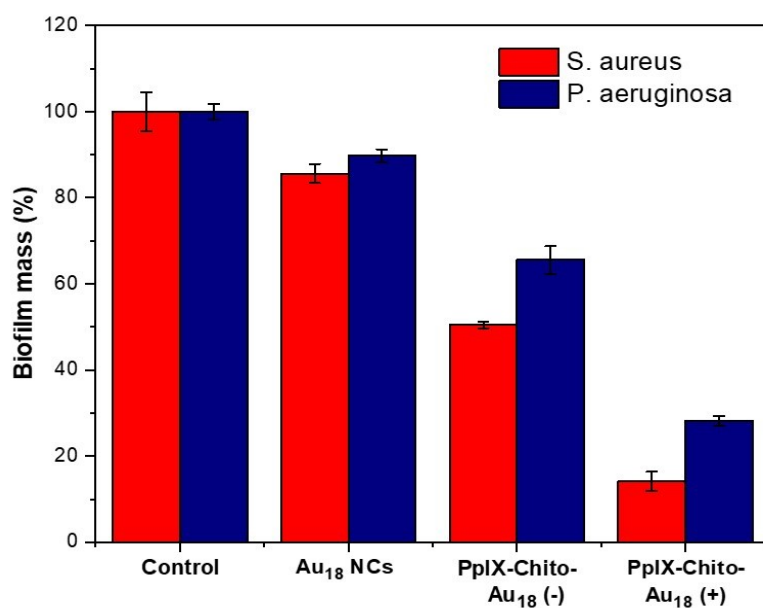

**Figure S5.** Quantitative evaluation of biofilm mass percentage after treating the biofilms of both *S. aureus* and *P. aeruginosa* with Au<sub>18</sub> NCs only and PpIX-Chito-Au<sub>18</sub> nanocomposite under dark (-) and light (+) conditions using standard crystal violet assay.

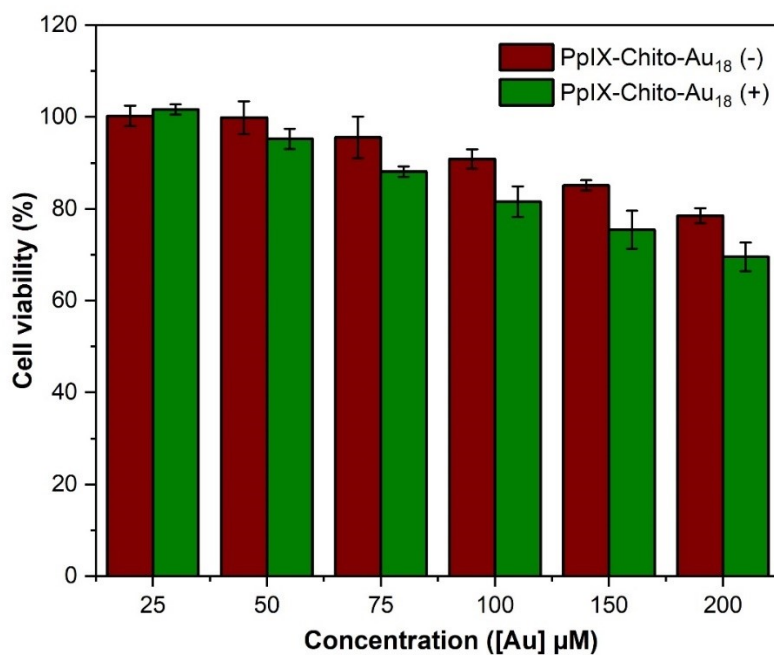

**Figure S6.** Analysing the safety profile of PpIX-Chito-Au<sub>18</sub> under dark (-) and light (+) conditions on mouse embryonic fibroblast cell line NIH 3T3.
